# Supplementary material for: Evaluation of the Mini-Mental State Examination and the Montreal Cognitive Assessment for Predicting Post-stroke Cognitive Impairment During the Acute Phase in Chinese Minor Stroke Patients
Source: PubMed Central journal article supplement (PMC7424073; doi:10.3389/fnagi.2020.00236), 2020-08-06
Supplement: Image_1.pdf [file Image_1.pdf]

## Supplementary material

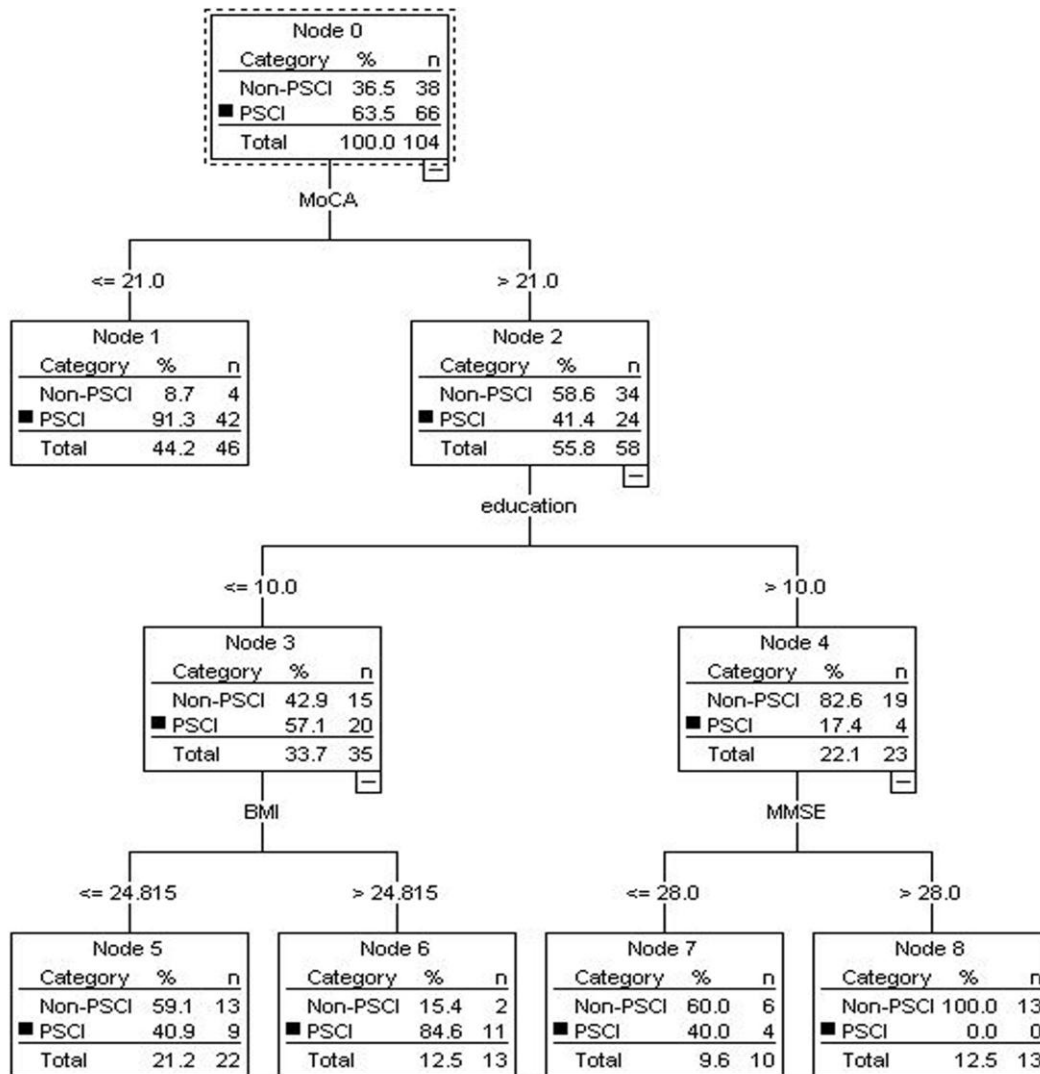

**Figure S1.** A decision tree model for the prediction of cognitive impairment at 3 to 6 months after the onset of stroke that includes baseline MoCA scores, educational level, body mass index (BMI), and baseline MMSE scores.
