# Supplementary material for: Evaluation of the Mini-Mental State Examination and the Montreal Cognitive Assessment for Predicting Post-stroke Cognitive Impairment During the Acute Phase in Chinese Minor Stroke Patients
Source: PubMed Central journal article supplement (PMC7424073; doi:10.3389/fnagi.2020.00236), 2020-08-06
Supplement: Table_1.pdf [file Table_1.pdf]

### Supplementary material

**Table S1** Baseline Characteristics of patients with and without follow-up.

|                                            | Patients with<br>follow-up<br>(n=104) | Patients without<br>follow-up<br>(n=125) | <i>P</i> value |
|--------------------------------------------|---------------------------------------|------------------------------------------|----------------|
| Age, y (mean $\pm$ SD)                     | 64.0 $\pm$ 9.8                        | 60.6 $\pm$ 9.6                           | 0.009*         |
| Sex, female (%)                            | 34 (32.7)                             | 45 (36.0)                                | 0.600          |
| Education, y (median $\pm$ IQR)            | 8.5 $\pm$ 7.0                         | 7.0 $\pm$ 8.0                            | 0.465          |
| BMI, kg/m <sup>2</sup> (mean $\pm$ SD)     | 24.4 $\pm$ 2.8                        | 24.4 $\pm$ 3.1                           | 0.924          |
| Baseline NIHSS score<br>(median $\pm$ IQR) | 1.0 $\pm$ 2.0                         | 1.0 $\pm$ 2.0                            | 0.038*         |
| Baseline MMSE score<br>(median $\pm$ IQR)  | 27.5 $\pm$ 3.0                        | 27.0 $\pm$ 3.0                           | 0.097          |
| Baseline MoCA score<br>(mean $\pm$ SD)     | 22.0 $\pm$ 8.0                        | 22.0 $\pm$ 6.0                           | 0.385          |

SD, standard deviation; IQR, inter-quartile range; BMI, body mass index; NIHSS, National Institutes of Health Stroke Scale; MMSE, Mini-Mental State Examination; MoCA, Montreal Cognitive Assessment; \* $P < 0.05$ .
